# Supplementary material for: Continuous fabrication of multi-stimuli responsive graphene oxide composite hydrogel fibres by microfluidics
Source: Royal Society of Chemistry journal article supplement (doi:10.1039/c7ra01750b), 2017-01-01
Supplement: c7ra01750b1.pdf [file c7ra01750b1.pdf]

## Continuous fabrication of multi-stimuli responsive graphene oxide composite hydrogel fibres by microfluidics

Li Peng,<sup>a</sup> Yan Liu,<sup>a,b</sup> Jinghua Gong,<sup>a</sup> Kaihuan Zhang<sup>\*b</sup> and Jinghong Ma<sup>\*a</sup>

<sup>a</sup> State Key Laboratory for Modification of Chemical Fibers and Polymer Materials, College of Material Science and Engineering, Donghua University, C472, 201620, Shanghai, China.

<sup>b</sup> Materials Science and Technology of Polymers, MESA<sup>+</sup> institute of Nanotechnology, University of Twente, P.O. Box217, 7500 AE Enschede, The Netherlands.

\* Corresponding author. E-mail: [k.zhang-1@utwente.nl](mailto:k.zhang-1@utwente.nl) and [mjh68@dhu.edu.cn](mailto:mjh68@dhu.edu.cn)

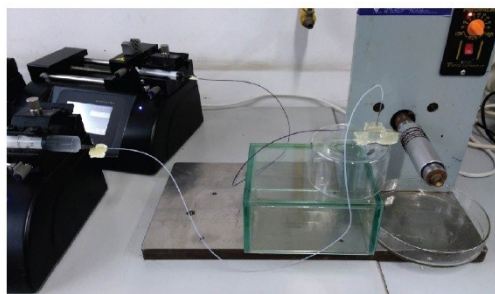

Figure S1. Photograph showing the hydrogel fibre formed via a microfluidic spinning process.

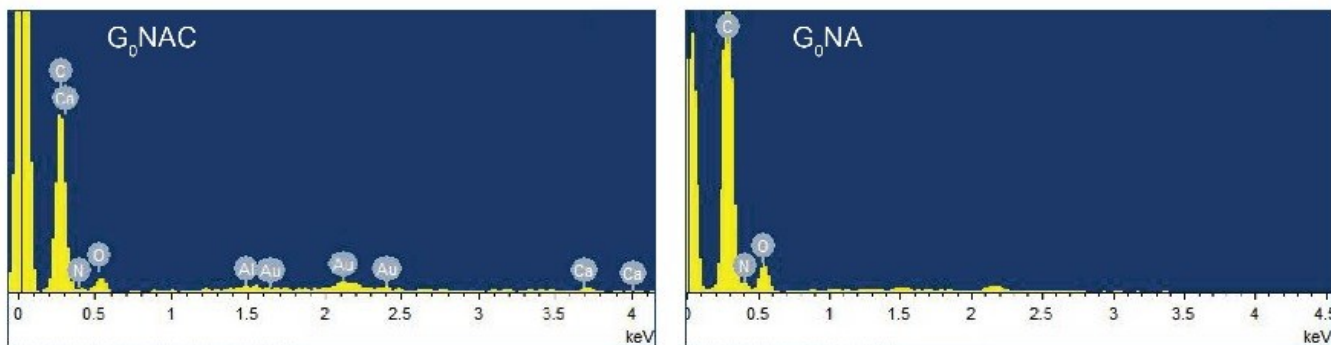

Figure S2. EDS spectra of the G<sub>0</sub>NAC and G<sub>0</sub>NA hydrogel fibres.

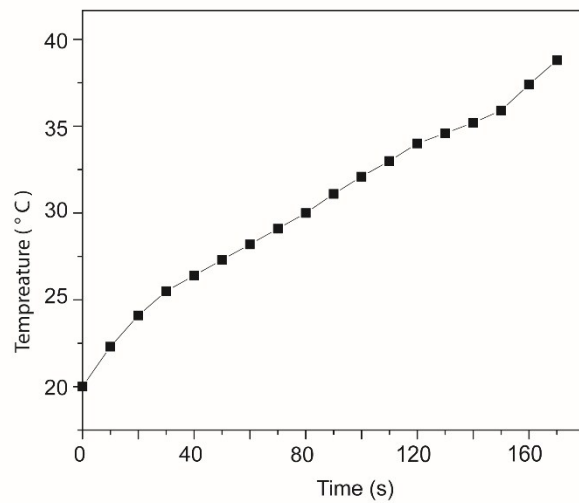

Figure S3. Temperature of the electrolyte solution at different time under a dc voltage of 20 V.
